# Supplementary material for: In situ optical measurement of the rapid Li intercalation and deintercalation dynamics in colloidal 2D layered TiS2nanodiscs
Source: Royal Society of Chemistry journal article supplement (doi:10.1039/c6nr02125e), 2016-01-01
Supplement: c6nr02125e1.pdf [file c6nr02125e1.pdf]

# In-situ Optical Measurement of the Rapid Li Intercalation and Deintercalation Dynamics in Colloidal 2D Layered TiS<sub>2</sub> nanodiscs

*Jiageng Ren,<sup>†</sup> Luis E. Camacho-Forero,<sup>‡</sup> Daniel Rossi,<sup>†</sup> Yerok Park<sup>†</sup> Perla B. Balbuena,<sup>‡</sup> Dong*

*Hee Son<sup>\*,†</sup>*

<sup>†</sup>Department of Chemistry, Texas A&M University, College Station, Texas 77843, United States

<sup>‡</sup>Department of Chemical Engineering, Texas A&M University, College Station, Texas 77843, United States

- **Fabrication of TiS<sub>2</sub> film**

The colloidal TiS<sub>2</sub> nanodiscs were deposited by partially submerging the ITO/glass substrate to colloidal TiS<sub>2</sub> nanodisc solutions dispersed in chloroform for 12 hours. Due to the absence of strong coordination of the surfactant to the polar basal planes of TiS<sub>2</sub> nanodiscs, they readily adsorb on the polar surface of ITO. ITO/glass substrate was rinsed with ethanol and dried with N<sub>2</sub> before use.

- **Optical measurement of Intercalation**

Light source: Tungsten halogen light source

Reference: ITO/glass substrate without TiS<sub>2</sub> immersed in the cuvette containing the same solvent (acetonitrile) and electrolyte (LiClO<sub>4</sub>)

- (1) With CCD spectrometer: The reference data,  $R(\lambda)$ , was taken before making the measurement on sample  $S(\lambda,t)$ , and the absorbance  $A(\lambda,t)$  was obtained by taking from  $-\log(S(\lambda,t)/R(\lambda))$ .
- (2) With dispersive spectrometer at near-IR: The spectrometer was setup in dual-beam configuration and the signals from reference,  $R(\lambda)$ , and sample,  $S(\lambda,t)$ , were acquired simultaneously using two amplified InGaAs photodiodes as the detector.

- **Electrode potential dependence of  $\Delta A(t)/A$**

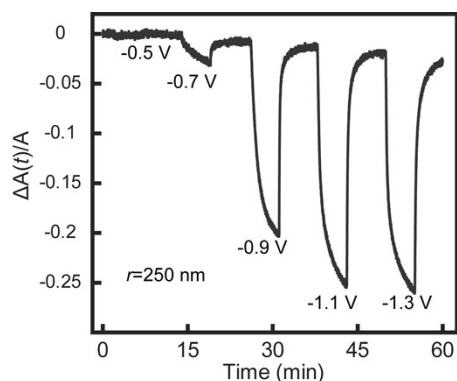

**Figure S1.** Dependence of  $\Delta A(t)/A$  on the reference electrode potential measured in  $\text{TiS}_2$  nanodiscs with  $r=250$  nm. The potential is with respect to Ag pseudo reference electrode.  $-1.1$  V for intercalation was chosen since it shows the saturation of the modulation amplitude of  $\Delta A(t)/A$  for intercalation.

- **Absence of contribution to  $\Delta A(t)/A$  from the substrate**

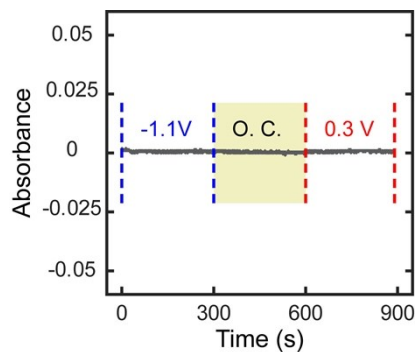

**Figure S2.** Absorption value of ITO/glass at 600 nm at  $-1.1$  V and  $0.3$  V vs Ag pseudo reference electrode. ITO/glass substrate has no contribution the measured  $\Delta A(t)/A$ .

- **Biexponential fitting of  $\Delta A(t)/A$**

The  $\Delta A(t)/A$  data was fitting through biexponential model to extract time components.

$$\frac{\Delta A(t)}{A} = A_1 \exp\left(-\frac{t}{\tau_1}\right) + A_2 \exp\left(-\frac{t}{\tau_2}\right) + c$$

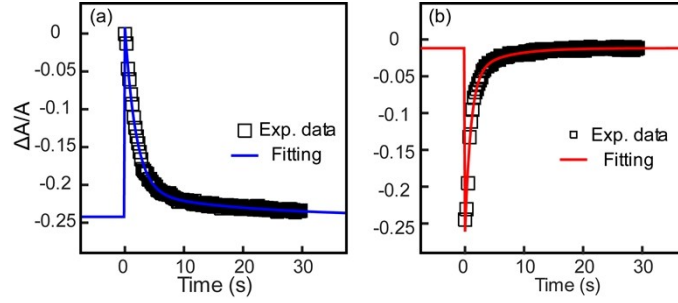

**Figure S3.** Fitting of  $\Delta A(t)/A$  with bi-exponential model for  $r=80$  nm sample at (a)  $-1.1$  V and (b)  $0.3$  V.

For  $\text{TiS}_2$  with  $r=80$  nm

| Cycle No. | Intercalation ( $-1.1$ V) |              |       |              | Deintercalation ( $0.3$ V) |              |       |              |
|-----------|---------------------------|--------------|-------|--------------|----------------------------|--------------|-------|--------------|
|           | $A_1$                     | $\tau_1$ (s) | $A_2$ | $\tau_2$ (s) | $A_1$                      | $\tau_1$ (s) | $A_2$ | $\tau_2$ (s) |
| 1         | 0.87                      | 1.9          | 0.13  | 20           | 0.85                       | 1.0          | 0.15  | 5.6          |
| 2         | 0.94                      | 2.0          | 0.06  | 132          | 0.92                       | 1.4          | 0.08  | 8.9          |
| 3         | 0.96                      | 1.8          | 0.04  | 39           | 0.93                       | 1.2          | 0.07  | 11           |
| 4         | 0.96                      | 2.0          | 0.04  | 59           | 0.92                       | 1.2          | 0.08  | 11           |
| 5         | 0.94                      | 2.0          | 0.06  | 42           | 0.91                       | 1.3          | 0.09  | 10           |
| 6         | 0.92                      | 2.1          | 0.08  | 26           | 0.91                       | 1.3          | 0.09  | 16           |
| 7         | 0.91                      | 2.5          | 0.09  | 30           | 0.92                       | 1.7          | 0.08  | 22           |
| 8         | 0.89                      | 2.5          | 0.11  | 26           | 0.89                       | 1.7          | 0.11  | 28           |
| 9         | 0.87                      | 2.8          | 0.13  | 29           | 0.89                       | 2.1          | 0.11  | 28           |
| 10        | 0.85                      | 2.8          | 0.15  | 33           | 0.89                       | 2.4          | 0.11  | 32           |

For  $\text{TiS}_2$  with  $r=250$  nm

| Cycle No. | Intercalation ( $-1.1$ V) |              |       |                   | Deintercalation ( $0.3$ V) |              |       |              |
|-----------|---------------------------|--------------|-------|-------------------|----------------------------|--------------|-------|--------------|
|           | $A_1$                     | $\tau_1$ (s) | $A_2$ | $\tau_2$ (s)      | $A_1$ (%)                  | $\tau_1$ (s) | $A_2$ | $\tau_2$ (s) |
| 1         | 0.75                      | 3.8          | 0.25  | $1.2 \times 10^2$ | 0.84                       | 2.4          | 0.16  | 50           |

|    |      |     |      |    |  |      |     |      |    |
|----|------|-----|------|----|--|------|-----|------|----|
| 2  | 0.88 | 4.1 | 0.12 | 64 |  | 0.81 | 2.3 | 0.19 | 43 |
| 3  | 0.89 | 4.7 | 0.11 | 36 |  | 0.81 | 2.8 | 0.19 | 46 |
| 4  | 0.86 | 5.2 | 0.14 | 37 |  | 0.80 | 3.0 | 0.20 | 44 |
| 5  | 0.84 | 5.7 | 0.16 | 51 |  | 0.78 | 3.1 | 0.22 | 43 |
| 6  | 0.79 | 6.7 | 0.21 | 50 |  | 0.78 | 3.7 | 0.22 | 46 |
| 7  | 0.78 | 7.4 | 0.22 | 52 |  | 0.81 | 5.1 | 0.19 | 48 |
| 8  | 0.76 | 8.6 | 0.24 | 53 |  | 0.78 | 4.9 | 0.22 | 48 |
| 9  | 0.71 | 8.9 | 0.29 | 52 |  | 0.76 | 5.6 | 0.24 | 47 |
| 10 | 0.68 | 9.6 | 0.32 | 55 |  | 0.75 | 6.2 | 0.25 | 50 |

**Table S1.** Fitting parameter of  $\Delta A(t)/A$  with biexponential function. The amplitudes ( $A_1$  and  $A_2$ ) are the fractional amplitudes.

- **Estimation of effective diffusion coefficient ( $D$ ) of Li in  $\text{TiS}_2$  nanodiscs.**

The normalized experimental data of  $|\Delta A(t)/A|$  was fit with the following expression of  $C(t,r)$ , which represents average concentration of Li normalized to its terminal concentration in a cylinder of radius  $r$  under 2-dimensional radial diffusion condition. <sup>1</sup>

$$C(t,r) = 1 - \sum_n \frac{4}{a_n} \exp\left(-D \frac{a_n^2}{r^2} t\right)$$

For this fitting, the following 12 leading terms for  $a_n$  were used in the summation, which are the solutions of the Bessel function of the first kind  $J_0(x)$ .

2.405, 5.520, 8.654, 11.1975, 14.9309, 18.0711, 21.2116, 24.3525, 27.4935, 30.6346, 33.7758, 36.9171

- **Calibration of Ag wire pseudo-reference**

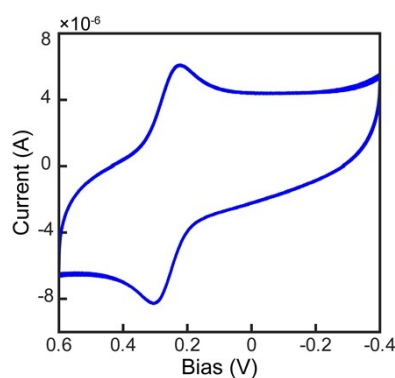

**Figure S4.** Ag pseudo-reference electrode calibration. The working electrode was a glassy carbon electrode, with a Pt wire as the counter electrode. The electrolyte was  $1 \times 10^{-4}$  M ferrocene in 0.1 M  $\text{LiClO}_4$  acetonitrile solution. The average of the oxidation and reduction peak in 14 cycles as shown was around 0.25 V. Given that the potential of  $\text{Fc}^+/\text{Fc}$  in acetonitrile is 0.62 V versus standard hydrogen electrode (SHE),<sup>2</sup> the pseudo-reference of Ag electrode was around 0.37 V versus SHE.

- **$\text{Li}_x\text{TiS}_2$  model and respective cell parameters**

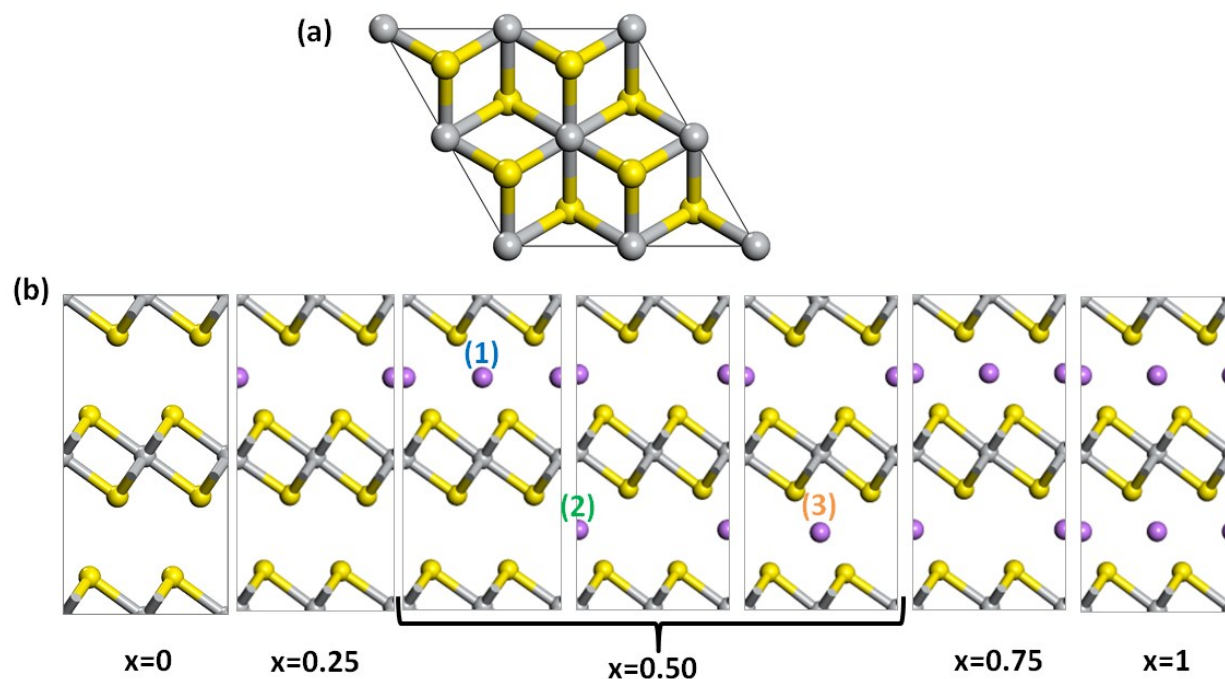

**Figure S5.**  $\text{Li}_x\text{TiS}_2$  model. (a) top view of  $2\times 2\times 2$  supercell  $\text{Li}_x\text{TiS}_2$  bulk; Li cannot be seen because they are in the same plane as Ti atoms. (b) All different configurations for  $\text{Li}_x\text{TiS}_2$ . Gray, yellow, and pink spheres represent Ti, S, and Li atoms, respectively.

| x        | Supercell |       |        | Ave. per unit cell* |           |
|----------|-----------|-------|--------|---------------------|-----------|
|          | a (Å)     | b (Å) | c (Å)  | $a_u$ (Å)           | $c_u$ (Å) |
| 0.00     | 6.792     | 6.792 | 11.411 | 3.396               | 5.705     |
| 0.25     | 6.777     | 6.784 | 11.783 | 3.390               | 5.892     |
| 0.50-(1) | 6.792     | 6.792 | 11.827 | 3.396               | 5.914     |
| 0.50-(2) | 6.766     | 6.786 | 12.183 | 3.388               | 6.092     |
| 0.50-(3) | 6.779     | 6.787 | 12.135 | 3.392               | 6.068     |
| 0.75     | 6.791     | 6.798 | 12.188 | 3.397               | 6.094     |
| 1.00     | 6.806     | 6.806 | 12.221 | 3.403               | 6.110     |

$$* a_u = (a + b)/4; a_u = c/2$$

**Table S2.** Optimized lattice parameters (a, b, and c) for different ratios and configurations of Li-intercalated in  $\text{TiS}_2$  ( $\text{Li}_x\text{TiS}_2$ ) in the supercell  $2\times 2\times 2$ .  $a_u$  and  $c_u$  stand for the equivalent lattice parameters per unit cell.

- Complex dielectric function ( $\epsilon_{\parallel}, \epsilon_{\perp}$ ) and refractive index ( $k_{\parallel}$ ) as a function of  $x$  in  $\text{Li}_x\text{TiS}_2$

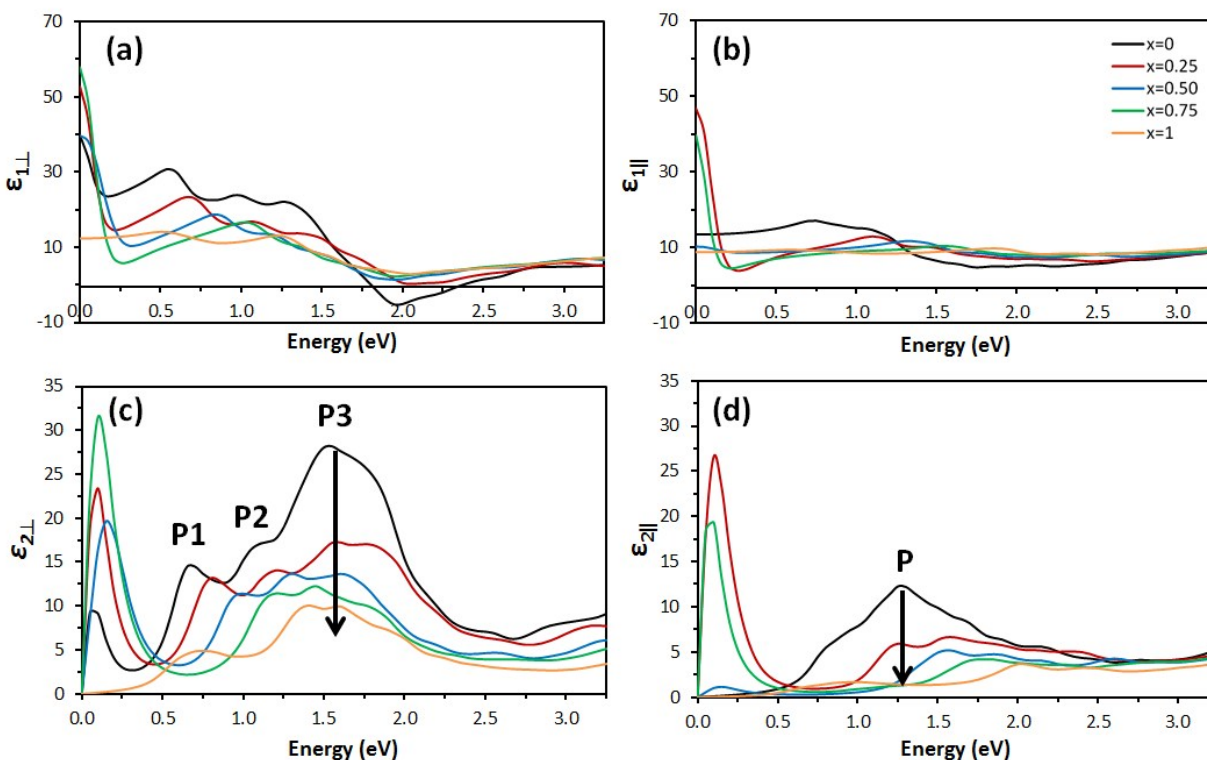

**Figure S6.** Complex dielectric function parallel ( $\epsilon_{\parallel}$ ) and perpendicular ( $\epsilon_{\perp}$ ) to the  $c$ -axis of  $\text{TiS}_2$ . Real and imaginary part of the dielectric function, (a, b)  $\epsilon_1$  and (c, d)  $\epsilon_2$  respectively, as a function of  $x$  in  $\text{Li}_x\text{TiS}_2$ . Arrows indicate the change of intensity at the main peaks as the concentration of lithium increases.

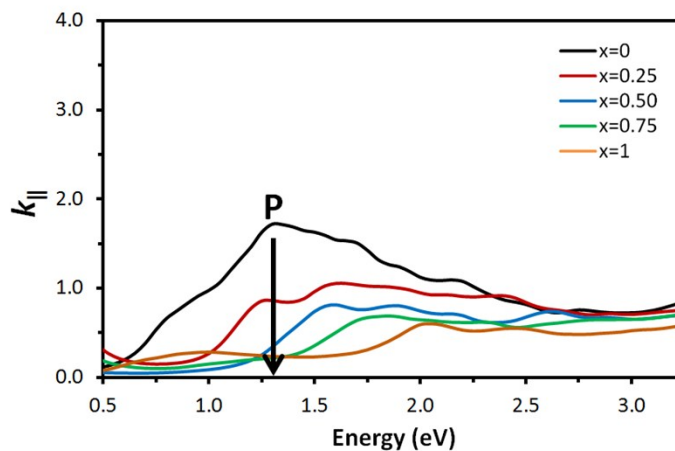

**Figure S7.** Parallel (out-of-plane) component of the imaginary part of refractive index ( $k_{\parallel}$ ) as a function of  $x$  in  $\text{Li}_x\text{TiS}_2$ . Arrow indicates change of intensity at the main peak as the concentration of lithium increases.



(1) Crank, J. Diffusion in a cylinder. In *The Mathematics of Diffusion*; Oxford University Press: Bristol, England, **1975**; pp 73-74.

(2) Pavlishchuk, V. V.; Addison, A. W. Conversion constants for redox potentials measured versus different reference electrodes in acetonitrile solutions at 25°C. *Inorg. Chim. Acta* **2000**, *298*, 97-102.
